# Supplementary material for: Streptococcus agalactiae Infection in Wild Trahira (<em>Hoplias malabaricus</em>) and Farmed Arapaima (<em>Arapaima gigas</em>) in Brazil: An Interspecies Transmission in Aquatic Environments Shared with Nile Tilapia (<em>Oreochromis niloticus</em>)
Source: Preprints.org preprint supplement (doi:10.20944/preprints202411.0166.v1), 2024-11-04
Supplement: Supplementary file 1 [file supplementary]

**Table S1-** Strains, host, origin, and ST of *Streptococcus agalactiae* strains used in phylogenomic analysis

| **Strain** | **Host** | **State** | **ST** | **Accession Number** | **Reference** |
| --- | --- | --- | --- | --- | --- |
| SA32-17 | *Hoplias malabaricus* | Minas Gerais | NT |  | This study |
| SA45-17 | *Arapaima gigas* | Minas Gerais | 260 |  | This study |
| SA1 | *Oreochromis niloticus* | Minas Gerais | NT | CP019804.1 | Barony et al., 2017 |
| SA5 | *Oreochromis niloticus* | Espírito Santo | NT | CP019805.1 | Barony et al., 2017 |
| SA9 | *Oreochromis niloticus* | Espírito Santo | NT | CP019806.1 | Barony et al., 2017 |
| SA53 | *Oreochromis niloticus* | Ceará | 260 | CP019802.1 | Barony et al., 2017 |
| SA73 | *Oreochromis niloticus* | Ceará | 260 | CP019803.1 | Barony et al., 2017 |
| SA75 | *Oreochromis niloticus* | Ceará | 260 | CP019808.1 | Barony et al., 2017 |
| SA79 | *Oreochromis niloticus* | Santa Catarina | NT | CP019809.1 | Barony et al., 2017 |
| SA81 | *Pseudoplatystoma* sp. | Mato Grosso | NT | CP019810.1 | Barony et al., 2017 |
| SA85 | *Oreochromis niloticus* | Alagoas | 927 | CP019811.1 | Barony et al., 2017 |
| SA95 | *Oreochromis niloticus* | Alagoas | 927 | CP019812.1 | Barony et al., 2017 |
| SA97 | *Oreochromis niloticus* | Pernambuco | 927 | CP019813.1 | Barony et al., 2017 |
| SA102 | *Oreochromis niloticus* | Pernambuco | 927 | CP019814.1 | Barony et al., 2017 |
| SA132 | *Oreochromis niloticus* | Ceará | 260 | CP019815.1 | Barony et al., 2017 |
| SA136 | *Oreochromis niloticus* | Ceará | 260 | CP019816.1 | Barony et al., 2017 |
| SA159 | *Oreochromis niloticus* | Minas Gerais | NT | CP019817.1 | Barony et al., 2017 |
| SA184 | *Oreochromis niloticus* | Espírito Santo | NT | CP019818.1 | Barony et al., 2017 |
| SA191 | *Oreochromis niloticus* | Ceará | 260 | CP019819.1 | Barony et al., 2017 |
| SA195 | *Oreochromis niloticus* | São Paulo | NT | CP019820.1 | Barony et al., 2017 |
| SA201 | *Oreochromis niloticus* | Espírito Santo | NT | CP019821.1 | Barony et al., 2017 |
| SA209 | *Oreochromis niloticus* | São Paulo | NT | CP019822.1 | Barony et al., 2017 |
| SA212 | *Oreochromis niloticus* | São Paulo | NT | CP019823.1 | Barony et al., 2017 |
| SA218 | *Oreochromis niloticus* | Espírito Santo | 927 | CP019824.1 | Barony et al., 2017 |
| SA220 | *Oreochromis niloticus* | São Paulo | NT | CP019825.1 | Barony et al., 2017 |
| SA245 | *Oreochromis niloticus* | Minas Gerais | 260 | CP019826.1 | Barony et al., 2017 |
| SA256 | *Oreochromis niloticus* | Ceará | 260 | CP019827.1 | Barony et al., 2017 |
| SA289 | *Oreochromis niloticus* | Ceará | 260 | CP019828.1 | Barony et al., 2017 |
| SA330 | *Oreochromis niloticus* | São Paulo | NT | CP019829.1 | Barony et al., 2017 |
| SA333 | *Oreochromis niloticus* | Goiás | NT | CP019830.1 | Barony et al., 2017 |
| SA341 | *Oreochromis niloticus* | Minas Gerais | NT | CP019831.1 | Barony et al., 2017 |
| SA343 | *Oreochromis niloticus* | Minas Gerais | NT | CP019832.1 | Barony et al., 2017 |
| SA346 | *Oreochromis niloticus* | Minas Gerais | NT | CP019833.1 | Barony et al., 2017 |
| SA374 | *Oreochromis niloticus* | São Paulo | NT | CP019834.1 | Barony et al., 2017 |
| SA375 | *Oreochromis niloticus* | São Paulo | NT | CP019835.1 | Barony et al., 2017 |
| SA623 | *Oreochromis niloticus* | Minas Gerais | NT | CP019836.1 | Barony et al., 2017 |
| SA627 | *Oreochromis niloticus* | Minas Gerais | NT | CP019837.1 | Barony et al., 2017 |

1. Barony, G.M.; Tavares, G.C.; Pereira, F.L.; Carvalho, A.F.; Dorella, F.A.; Leal, C.A.G.; Figueiredo, H.C.P. Large-scale genomic analyses reveal the population structure and evolutionary trends of *Streptococcus* *agalactiae* strains in Brazilian fish farms. *Sci. Rep.* **2017**, *7*, 13538, doi:10.1038/s41598-017-13228-z.
